# Supplementary material
Source: Springer Nature journal article supplement (https://www.springermedizin.de/resource/supplementary/13054_2011_501_MOESM1_ESM.pdf/9707100)

### Response time reliability: rate of first vehicle arriving within 8 minutes [%]

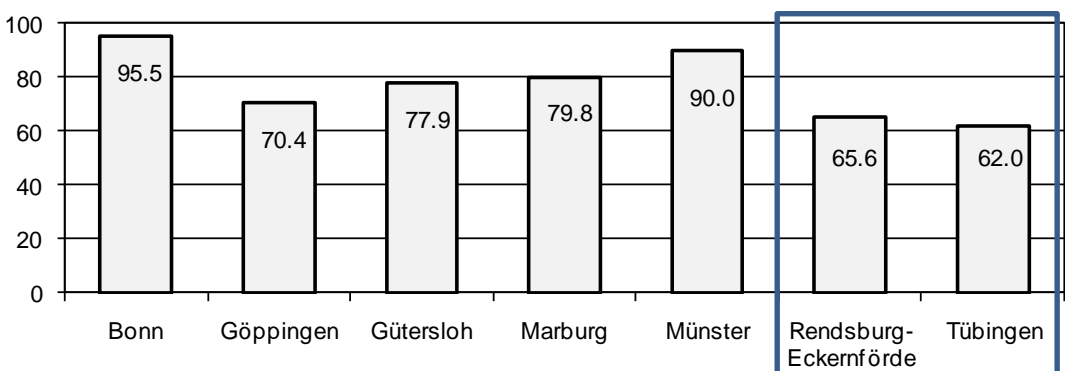

### CPR incidence [1 / 100,000 inhabitants / year]

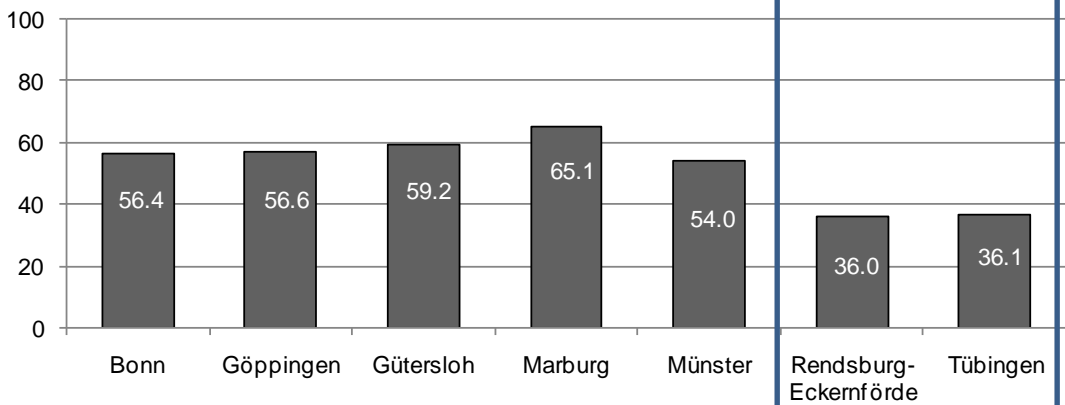

### Admitted to hospital [1 / 100,000 inhabitants / year]

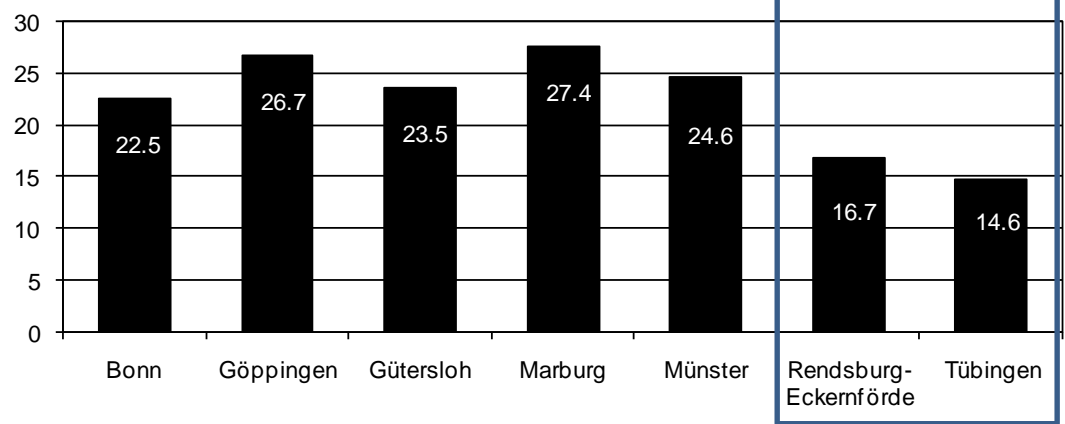

Supplement: MOESM1 [file 9707100]
